# Supplementary material
Source: MDPI journal article supplement (https://www.mdpi.com/2076-3417/11/13/6013)
Supplement: s1 [file s1]

## Supplementary Material

**Table 1. Intra- and interrater reliability of the different workflows.** Results are summarized for the canines, front teeth, molars, and premolars. ICC = intraclass correlation coefficient (two-way mixed, absolute agreement).

| Workflow      | Measurement          | ICC intra | ICC inter |
|---------------|----------------------|-----------|-----------|
| Micro-CT      | molars m/d           | 0.950     | 0.972     |
|               | molars lab/ling      | 0.899     | 0.879     |
|               | molars occl/ging     | 0.953     | 0.963     |
|               | molars torque        | 0.882     | 0.867     |
|               | molars angulation    | 0.969     | 0.972     |
|               | premolars m/d        | 0.954     | 0.964     |
|               | premolars lab/ling   | 0.974     | 0.976     |
|               | premolars occl/ging  | 0.917     | 0.928     |
|               | premolars torque     | 0.846     | 0.917     |
|               | premolars angulation | 0.965     | 0.919     |
|               | canines m/d          | 0.942     | 0.952     |
|               | canines lab/ling     | 0.804     | 0.818     |
|               | canines occl/ging    | 0.910     | 0.950     |
|               | canines torque       | 0.918     | 0.893     |
|               | canines angulation   | 0.980     | 0.919     |
|               | incisors m/d         | 0.898     | 0.919     |
|               | incisors lab/ling    | 0.804     | 0.853     |
|               | incisors occl/ging   | 0.908     | 0.957     |
|               | incisors torque      | 0.880     | 0.912     |
|               | incisors angulation  | 0.970     | 0.971     |
| Workflow      | Measurement          | ICC intra | ICC inter |
| Introral scan | molars max           | 0.855     | 0.747     |
|               | molars min           | 0.757     | 0.676     |
|               | molars mean          | 0.873     | 0.922     |
|               | molars sd            | 0.970     | 0.975     |
|               | premolars max        | 0.648     | 0.622     |
|               | premolars min        | 0.798     | 0.642     |
|               | premolars mean       | 0.840     | 0.783     |
|               | premolars sd         | 0.979     | 0.951     |
|               | canines max          | 0.622     | 0.654     |
|               | canines min          | 0.914     | 0.810     |
|               | canines mean         | 0.911     | 0.790     |
|               | canines sd           | 0.974     | 0.958     |
|               | incisors max         | 0.380     | 0.388     |
|               | incisors min         | 0.379     | 0.811     |
|               | incisors mean        | -0.073    | 0.855     |
|               | incisors sd          | -0.037    | 0.972     |
